# Supplementary material for: Unraveling Zooplankton Diversity in a Pre-Alpine Lake: A Comparative Analysis of ZooScan and DNA Metabarcoding Methods
Source: MDPI journal article supplement (doi:10.3390/w16030411), 2024-01-26
Supplement: s1 [file s1]

Archive with 3 entries (3 files):
- Table S1.xlsx
- Table S2.xlsx
- water-2789378-supplementary.pdf
