# Supplementary material for: Unraveling Zooplankton Diversity in a Pre-Alpine Lake: A Comparative Analysis of ZooScan and DNA Metabarcoding Methods
Source: MDPI journal article supplement (doi:10.3390/w16030411), 2024-01-26
Supplement: s1 [file s1 › Table S1.xlsx]

## Sheet: OTU-Tab
OTU ID	Tot_seqs	Phylum	Class	Order	Family	Genus	Species	Similarity	170S01	170S02	170S03	170S04	170S05	170S06	170S07	170S08	170S09	170S10
OTU_1	52445	Arthropoda	Branchiopoda	Anomopoda	Daphniidae	Daphnia	galeata	100	3724	6787	5322	6095	5290	5623	5885	4455	5251	4013
OTU_2	54555	Arthropoda	Copepoda	Cyclopoida	Cyclopidae	Cyclops		96.97	9752	4259	7784	6396	4749	6206	5055	4128	3235	2991
OTU_3	5202	Arthropoda	Branchiopoda	Anomopoda	Bosminidae	Bosmina		97.94	370	887	332	771	639	335	938	336	268	326
OTU_4	2548	Arthropoda	Copepoda	Cyclopoida	Cyclopidae	Cyclops	abyssorum	98.7	10	398	512	282	192	218	357	235	207	137
OTU_5	695	Arthropoda	Branchiopoda	Ctenopoda	Sididae			92.95	108	35	62	64	96	84	34	70	71	71
OTU_6	254	Arthropoda	Copepoda	Calanoida	Diaptomidae	Eudiaptomus	gracilis	100	13	66	11	17	7	51	12	52	9	16
OTU_7	275	Arthropoda	Branchiopoda	Anomopoda	Bosminidae	Bosmina	coregoni	100	28	16	20	4	23	50	47	20	34	33
OTU_8	322	Arthropoda	Branchiopoda	Anomopoda	Daphniidae			92.59	19	63	28	46	28	33	28	23	23	31
OTU_9	287	Arthropoda	Branchiopoda	Anomopoda	Daphniidae			93.59	16	45	30	42	34	34	19	23	24	20
OTU_10	570	Arthropoda	Branchiopoda	Haplopoda	Leptodoridae	Leptodora	kindtii	100	0	65	37	38	15	41	106	87	0	181
OTU_11	89	Arthropoda	Branchiopoda	Anomopoda	Daphniidae	Daphnia		97.78	0	15	9	12	9	9	5	13	8	9
OTU_12	324	Ochrophyta	Phaeophyceae					67.35	0	2	9	13	70	23	50	37	20	100
OTU_13	1	Arthropoda	Branchiopoda	Anomopoda	Daphniidae	Daphnia	laevis	98.48	0	0	0	0	1	0	0	0	0	0
OTU_14	1	Arthropoda	Branchiopoda	Anomopoda	Daphniidae	Daphnia		97.78	0	1	0	0	0	0	0	0	0	0
OTU_15	83	Rhodophyta	Florideophyceae					70.82	0	0	0	0	7	75	0	1	0	0
OTU_16	120	Arthropoda	Branchiopoda	Anomopoda	Bosminidae	Bosmina		100	6	7	19	7	8	27	16	7	13	10
OTU_17	59	Arthropoda	Branchiopoda	Onychopoda	Cercopagididae	Bythotrephes	longimanus	100	0	6	0	4	4	2	9	13	21	0
OTU_18	1	Arthropoda	Copepoda	Calanoida	Diaptomidae	Eudiaptomus	gracilis	98.92	0	0	0	0	0	0	1	0	0	0
OTU_19	1	Arthropoda	Copepoda	Calanoida	Diaptomidae	Eudiaptomus		97.35	1	0	0	0	0	0	0	0	0	0
OTU_20	1	Arthropoda	Branchiopoda	Anomopoda	Daphniidae			94.44	0	1	0	0	0	0	0	0	0	0
OTU_21	170	Arthropoda	Branchiopoda	Anomopoda	Daphniidae	Daphnia	laevis	98.48	0	22	23	16	16	18	15	13	28	19
OTU_22	10	Arthropoda	Branchiopoda	Anomopoda	Daphniidae	Daphnia	laevis	98.09	0	5	0	0	2	2	1	0	0	0
OTU_23	1	Arthropoda	Branchiopoda	Anomopoda	Daphniidae	Daphnia	laevis	98.11	0	1	0	0	0	0	0	0	0	0
OTU_24	1	Arthropoda	Branchiopoda	Anomopoda	Daphniidae	Daphnia	mendotae	99.25	0	0	0	0	0	0	0	0	0	1
OTU_25	1	Arthropoda	Branchiopoda	Anomopoda	Daphniidae	Daphnia		95.51	0	0	0	0	0	0	0	0	1	0
OTU_26	1	Arthropoda	Branchiopoda	Anomopoda	Daphniidae	Daphnia		97.78	0	0	1	0	0	0	0	0	0	0
OTU_27	1	Arthropoda	Copepoda	Calanoida	Diaptomidae	Eudiaptomus	gracilis	98.56	0	0	0	0	0	1	0	0	0	0
OTU_28	12	Arthropoda	Copepoda	Cyclopoida	Cyclopidae	Mesocyclops	leuckarti	99.42	4	0	1	0	1	1	4	0	0	1
OTU_29	47	Chordata	Mammalia	Primates	Hominidae	Homo	sapiens	100	4	3	4	0	6	3	17	3	4	3
OTU_30	1	Arthropoda	Branchiopoda	Anomopoda	Bosminidae	Bosmina	longicornis	98.21	0	0	0	1	0	0	0	0	0	0
OTU_31	1	Arthropoda	Copepoda	Calanoida	Diaptomidae	Eudiaptomus		97.12	1	0	0	0	0	0	0	0	0	0
OTU_32	39	No Match	No Match	No Match	No Match	No Match	No Match		8	2	3	4	2	2	3	1	4	10
OTU_33	1	Arthropoda	Copepoda	Calanoida	Diaptomidae	Eudiaptomus		96.71	1	0	0	0	0	0	0	0	0	0
OTU_34	6	Arthropoda	Branchiopoda	Anomopoda	Daphniidae	Daphnia		95.08	0	1	1	1	1	1	0	1	0	0
OTU_35	1	Arthropoda	Branchiopoda	Anomopoda	Daphniidae	Daphnia	mendotae	98.17	0	0	1	0	0	0	0	0	0	0
OTU_36	2	Arthropoda	Branchiopoda	Anomopoda	Daphniidae	Daphnia		97.73	0	1	0	0	0	0	0	0	1	0
OTU_37	1	Arthropoda	Branchiopoda	Anomopoda	Bosminidae	Bosmina		96.56	1	0	0	0	0	0	0	0	0	0
OTU_38	2	Arthropoda	Copepoda	Calanoida	Diaptomidae	Eudiaptomus		97.31	0	0	0	0	0	0	0	0	1	1
OTU_39	1	Arthropoda	Copepoda	Cyclopoida	Cyclopidae	Cyclops		96.97	0	0	1	0	0	0	0	0	0	0
OTU_40	4	Arthropoda	Branchiopoda	Anomopoda	Daphniidae	Daphnia		97.41	0	0	1	0	1	0	0	1	0	1
OTU_41	28	Annelida	Clitellata					74.67	0	0	28	0	0	0	0	0	0	0
OTU_42	1	Arthropoda	Branchiopoda	Anomopoda	Daphniidae	Daphnia	laevis	98.85	0	0	0	1	0	0	0	0	0	0
OTU_43	74	Arthropoda	Branchiopoda	Anomopoda	Daphniidae	Daphnia		97.89	5	11	7	7	8	7	7	3	15	4
OTU_44	1	Arthropoda	Branchiopoda	Anomopoda	Bosminidae	Bosmina		97.38	0	1	0	0	0	0	0	0	0	0
OTU_45	1	Arthropoda	Branchiopoda	Anomopoda	Daphniidae	Daphnia		95.17	0	0	0	0	0	1	0	0	0	0
OTU_46	19	Arthropoda	Copepoda	Cyclopoida	Cyclopidae	Mesocyclops	leuckarti	98.25	11	1	0	1	1	1	2	2	0	0
OTU_47	43	Arthropoda	Branchiopoda	Anomopoda	Daphniidae	Daphnia		97.29	9	5	0	3	4	5	3	3	7	4
OTU_48	16	No Match	No Match	No Match	No Match	No Match	No Match		7	0	0	2	0	1	3	1	1	1
OTU_49	1	Arthropoda	Branchiopoda	Anomopoda	Daphniidae			93.68	0	0	0	0	0	0	1	0	0	0
OTU_50	1	Arthropoda	Copepoda	Calanoida	Diaptomidae	Eudiaptomus	gracilis	99.26	0	0	0	0	0	0	0	1	0	0
OTU_51	3	Arthropoda	Branchiopoda	Anomopoda	Daphniidae	Daphnia	laevis	99.18	0	1	0	0	0	0	1	0	0	1
OTU_52	1	Arthropoda	Branchiopoda	Anomopoda	Daphniidae			92.65	1	0	0	0	0	0	0	0	0	0
OTU_53	1	Arthropoda	Branchiopoda	Anomopoda	Daphniidae	Daphnia	laevis	98.84	0	1	0	0	0	0	0	0	0	0
OTU_54	1	Arthropoda	Branchiopoda	Anomopoda	Daphniidae			94.05	0	0	0	1	0	0	0	0	0	0
OTU_55	10	No Match	No Match	No Match	No Match	No Match	No Match		2	0	1	0	1	2	2	1	1	0
OTU_56	1	Arthropoda	Copepoda	Calanoida	Diaptomidae	Eudiaptomus		97.58	0	0	0	0	0	0	0	0	1	0
OTU_57	1	Arthropoda	Branchiopoda	Anomopoda	Daphniidae	Daphnia		97.33	0	0	0	0	0	0	0	0	1	0
OTU_58	1	Arthropoda	Branchiopoda	Anomopoda	Daphniidae	Daphnia	laevis	98.13	0	1	0	0	0	0	0	0	0	0
OTU_59	1	Arthropoda	Copepoda	Calanoida	Diaptomidae	Eudiaptomus		96.27	0	0	0	1	0	0	0	0	0	0
OTU_60	5	Arthropoda	Branchiopoda	Anomopoda	Daphniidae	Daphnia		97.73	0	2	0	1	2	0	0	0	0	0
OTU_61	1	Arthropoda	Branchiopoda	Anomopoda	Bosminidae	Bosmina		97.64	1	0	0	0	0	0	0	0	0	0
OTU_62	1	Arthropoda	Branchiopoda	Ctenopoda	Sididae	Diaphanosoma		96.91	0	0	0	0	1	0	0	0	0	0
OTU_63	1	Arthropoda	Copepoda	Calanoida	Diaptomidae	Eudiaptomus	gracilis	98.68	0	0	0	0	0	0	0	0	1	0
OTU_64	1	Arthropoda	Branchiopoda	Anomopoda	Daphniidae	Daphnia		97.78	0	0	1	0	0	0	0	0	0	0
OTU_65	1	Arthropoda	Branchiopoda	Anomopoda	Bosminidae	Bosmina		97.25	0	0	0	1	0	0	0	0	0	0
OTU_66	1	Arthropoda	Branchiopoda	Anomopoda	Bosminidae	Bosmina	longicornis	99.13	1	0	0	0	0	0	0	0	0	0
OTU_67	10	Arthropoda	Branchiopoda	Anomopoda	Daphniidae	Daphnia		96.96	1	2	1	1	2	1	0	1	1	0
OTU_68	1	Arthropoda	Branchiopoda	Anomopoda	Daphniidae	Daphnia		97.73	0	0	0	1	0	0	0	0	0	0
OTU_69	115	Arthropoda	Copepoda	Calanoida	Diaptomidae	Eudiaptomus		96.72	11	27	5	6	13	5	13	9	10	16
OTU_70	1	Arthropoda	Branchiopoda	Anomopoda	Daphniidae	Daphnia		96.33	0	1	0	0	0	0	0	0	0	0
OTU_71	1	Arthropoda	Copepoda	Cyclopoida	Cyclopidae	Cyclops		95.67	0	0	0	1	0	0	0	0	0	0
OTU_72	1	Arthropoda	Branchiopoda	Anomopoda	Daphniidae	Daphnia	laevis	98.11	0	0	0	1	0	0	0	0	0	0
OTU_73	5	No Match	No Match	No Match	No Match	No Match	No Match		2	0	0	1	1	0	0	1	0	0
OTU_74	1	Arthropoda	Branchiopoda	Anomopoda	Daphniidae	Daphnia		96.93	0	0	1	0	0	0	0	0	0	0
OTU_75	1	No Match	No Match	No Match	No Match	No Match	No Match		1	0	0	0	0	0	0	0	0	0
OTU_76	3	Arthropoda	Copepoda	Calanoida	Diaptomidae	Eudiaptomus		96.97	0	0	1	0	1	0	0	1	0	0
OTU_77	1	Arthropoda	Copepoda	Calanoida	Diaptomidae	Eudiaptomus		97.6	0	0	0	0	0	0	0	1	0	0
OTU_78	1	Arthropoda	Branchiopoda	Anomopoda	Daphniidae	Daphnia		97.19	0	0	0	0	1	0	0	0	0	0
OTU_79	1	Arthropoda	Branchiopoda	Anomopoda	Daphniidae	Daphnia	laevis	98.88	0	0	0	0	0	0	0	0	1	0
OTU_80	3	Arthropoda	Branchiopoda	Anomopoda	Daphniidae	Daphnia		95.14	0	1	0	0	0	0	0	0	2	0
OTU_81	1	Arthropoda	Branchiopoda	Anomopoda	Bosminidae	Bosmina		97.94	0	1	0	0	0	0	0	0	0	0
OTU_82	13	Arthropoda	Copepoda	Cyclopoida	Cyclopidae			91.21	2	3	0	1	0	1	0	4	2	0
OTU_83	6	Heterokontophyta	Oomycota	Saprolegniales	Saprolegniaceae			90.81	0	0	2	0	0	0	0	1	1	2
OTU_84	1	Arthropoda	Copepoda	Calanoida	Diaptomidae	Eudiaptomus	gracilis	98.32	0	0	0	0	0	0	0	1	0	0
OTU_85	1	Arthropoda	Copepoda	Calanoida	Diaptomidae	Eudiaptomus	gracilis	98.41	0	0	0	0	0	0	0	1	0	0
OTU_86	1	Arthropoda	Branchiopoda	Anomopoda	Daphniidae	Daphnia	laevis	98.08	0	0	0	0	1	0	0	0	0	0
OTU_87	1	Arthropoda	Branchiopoda	Anomopoda	Daphniidae	Daphnia		97.78	0	0	0	0	0	0	0	1	0	0
OTU_88	1	Arthropoda	Branchiopoda	Anomopoda	Bosminidae	Bosmina		97.91	1	0	0	0	0	0	0	0	0	0
OTU_89	3	Arthropoda	Branchiopoda	Anomopoda	Daphniidae	Daphnia		95.83	0	0	0	1	0	0	0	1	1	0
OTU_90	2	Arthropoda	Branchiopoda	Anomopoda	Bosminidae	Bosmina		97.86	0	0	0	0	1	0	0	0	1	0
OTU_91	1	Arthropoda	Branchiopoda	Anomopoda	Daphniidae	Daphnia		97.37	0	0	0	0	1	0	0	0	0	0
OTU_92	2	Arthropoda	Branchiopoda	Anomopoda	Daphniidae	Daphnia	laevis	98.15	0	0	0	0	0	2	0	0	0	0
OTU_93	3	Arthropoda	Branchiopoda	Anomopoda	Daphniidae	Daphnia		97.35	0	0	0	0	0	0	0	1	2	0
OTU_94	1	Arthropoda	Branchiopoda	Anomopoda	Bosminidae	Bosmina		97.11	0	0	1	0	0	0	0	0	0	0
OTU_95	40	Arthropoda	Copepoda	Calanoida	Diaptomidae	Eudiaptomus	gracilis	98.4	2	3	3	5	3	3	4	7	4	6
OTU_96	1	Arthropoda	Branchiopoda	Anomopoda	Daphniidae	Daphnia	laevis	98.14	0	1	0	0	0	0	0	0	0	0
OTU_97	1	Arthropoda	Branchiopoda	Anomopoda	Daphniidae			92.38	0	1	0	0	0	0	0	0	0	0
OTU_98	1	Arthropoda	Copepoda	Calanoida	Diaptomidae	Eudiaptomus		96.64	1	0	0	0	0	0	0	0	0	0
OTU_99	1	Arthropoda	Branchiopoda	Anomopoda	Daphniidae	Daphnia	laevis	98.13	0	1	0	0	0	0	0	0	0	0
OTU_100	1	Arthropoda	Branchiopoda	Anomopoda	Bosminidae	Bosmina		97.35	0	1	0	0	0	0	0	0	0	0
OTU_101	1	Arthropoda	Copepoda	Calanoida	Diaptomidae	Eudiaptomus		97.49	0	1	0	0	0	0	0	0	0	0
OTU_102	1	No Match	No Match	No Match	No Match	No Match	No Match		0	0	1	0	0	0	0	0	0	0
OTU_103	1	Arthropoda	Branchiopoda	Anomopoda	Daphniidae			92.57	0	0	1	0	0	0	0	0	0	0
OTU_104	1	Arthropoda	Copepoda	Cyclopoida	Cyclopidae	Cyclops		95.67	0	0	1	0	0	0	0	0	0	0
OTU_105	1	Arthropoda	Copepoda	Calanoida	Diaptomidae	Eudiaptomus		97.31	0	0	0	0	0	0	0	0	1	0
OTU_106	1	Arthropoda	Branchiopoda	Anomopoda	Daphniidae			93.1	0	1	0	0	0	0	0	0	0	0
OTU_107	1	Arthropoda	Copepoda	Cyclopoida	Cyclopidae	Cyclops		96.97	0	1	0	0	0	0	0	0	0	0
OTU_108	1	Arthropoda	Copepoda	Cyclopoida	Cyclopidae	Cyclops		95.67	0	1	0	0	0	0	0	0	0	0
OTU_109	10	Heterokontophyta	Oomycota	Saprolegniales	Saprolegniaceae			92.25	0	1	0	1	3	0	2	1	1	1
OTU_110	2	Arthropoda	Branchiopoda	Anomopoda	Daphniidae	Daphnia	mendotae	98.11	0	0	0	0	2	0	0	0	0	0
OTU_111	1	Arthropoda	Branchiopoda	Anomopoda	Daphniidae	Daphnia		97.78	0	1	0	0	0	0	0	0	0	0
OTU_112	1	Arthropoda	Branchiopoda	Anomopoda	Daphniidae	Daphnia	laevis	98.11	0	0	1	0	0	0	0	0	0	0
OTU_113	1	Arthropoda	Branchiopoda	Anomopoda	Bosminidae	Bosmina		97.62	0	0	0	0	1	0	0	0	0	0
OTU_114	1	Arthropoda	Branchiopoda	Haplopoda	Leptodoridae	Leptodora		96.96	0	0	0	0	0	0	0	1	0	0
OTU_115	1	Arthropoda	Copepoda	Calanoida	Diaptomidae	Eudiaptomus		96.77	1	0	0	0	0	0	0	0	0	0
OTU_116	1	Arthropoda	Copepoda	Cyclopoida	Cyclopidae	Cyclops		95.63	0	1	0	0	0	0	0	0	0	0
OTU_117	3	No Match	No Match	No Match	No Match	No Match	No Match		0	0	1	0	0	0	1	0	0	1
OTU_118	1	Arthropoda	Branchiopoda	Anomopoda	Daphniidae	Daphnia		97.78	0	0	1	0	0	0	0	0	0	0
OTU_119	3	Arthropoda	Branchiopoda	Anomopoda	Daphniidae	Daphnia		97.35	0	0	0	0	0	0	1	1	1	0
OTU_120	83	Arthropoda	Copepoda	Calanoida	Diaptomidae	Eudiaptomus		95.5	4	1	2	60	2	5	4	0	3	2
OTU_121	1	No Match	No Match	No Match	No Match	No Match	No Match		0	0	0	1	0	0	0	0	0	0
OTU_122	1	Arthropoda	Branchiopoda	Anomopoda	Bosminidae	Bosmina		98.23	0	0	0	0	0	1	0	0	0	0
OTU_123	1	Arthropoda	Branchiopoda	Anomopoda	Daphniidae	Daphnia	laevis	98.14	0	0	0	0	0	1	0	0	0	0
OTU_124	1	Arthropoda	Branchiopoda	Anomopoda	Daphniidae	Daphnia	laevis	98.13	0	0	0	0	0	0	0	1	0	0
OTU_125	1	Arthropoda	Copepoda	Calanoida	Diaptomidae	Eudiaptomus		96.77	0	0	0	0	0	0	0	0	1	0
OTU_126	103	Arthropoda	Copepoda	Calanoida	Diaptomidae	Eudiaptomus		96.51	16	3	10	14	7	12	9	4	14	14
OTU_127	5	No Match	No Match	No Match	No Match	No Match	No Match		2	0	0	0	1	0	0	0	0	2
OTU_128	1	Arthropoda	Branchiopoda	Anomopoda	Bosminidae			94.1	0	0	1	0	0	0	0	0	0	0
OTU_129	1	Arthropoda	Branchiopoda	Ctenopoda	Sididae	Diaphanosoma		96.81	0	0	0	0	0	0	0	1	0	0
OTU_130	1	Arthropoda	Copepoda	Calanoida	Diaptomidae	Eudiaptomus		97.85	0	0	0	0	0	0	0	0	1	0
OTU_131	4	Arthropoda	Copepoda	Calanoida	Diaptomidae	Eudiaptomus		97.44	4	0	0	0	0	0	0	0	0	0
OTU_132	1	Arthropoda	Branchiopoda	Anomopoda	Daphniidae	Daphnia		97.78	0	0	0	0	1	0	0	0	0	0
OTU_133	1	Arthropoda	Branchiopoda	Anomopoda	Daphniidae			92.96	0	0	0	0	0	0	0	1	0	0
OTU_134	2	Arthropoda	Branchiopoda	Anomopoda	Daphniidae	Daphnia	galeata	98.39	0	0	0	0	0	0	0	1	1	0
OTU_135	1	Arthropoda	Copepoda	Calanoida	Diaptomidae	Eudiaptomus		97.95	0	0	0	0	0	0	0	0	1	0
OTU_136	1	Arthropoda	Copepoda	Calanoida	Diaptomidae	Eudiaptomus	gracilis	98.36	0	0	0	0	0	0	0	0	1	0
OTU_137	1	Arthropoda	Branchiopoda	Anomopoda	Daphniidae	Daphnia		96.21	0	1	0	0	0	0	0	0	0	0
OTU_138	1	Arthropoda	Branchiopoda	Anomopoda	Daphniidae	Daphnia	laevis	98.11	0	1	0	0	0	0	0	0	0	0
OTU_139	1	Arthropoda	Branchiopoda	Anomopoda	Daphniidae	Daphnia		97.11	0	0	1	0	0	0	0	0	0	0
OTU_140	7	No Match	No Match	No Match	No Match	No Match	No Match		0	0	2	0	0	0	0	1	3	1
OTU_141	1	Arthropoda	Branchiopoda	Anomopoda	Daphniidae	Daphnia		96.92	0	0	1	0	0	0	0	0	0	0
OTU_142	4	No Match	No Match	No Match	No Match	No Match	No Match		0	0	0	1	0	0	0	1	0	2
OTU_143	1	Arthropoda	Branchiopoda	Anomopoda	Bosminidae	Bosmina		96.61	0	0	0	0	1	0	0	0	0	0
OTU_144	1	Arthropoda	Branchiopoda	Anomopoda	Bosminidae	Eubosmina		96.46	0	0	0	0	1	0	0	0	0	0
OTU_145	1	Arthropoda	Branchiopoda	Anomopoda	Daphniidae	Daphnia	laevis	98.13	0	0	0	0	1	0	0	0	0	0
OTU_146	1	Arthropoda	Branchiopoda	Anomopoda	Bosminidae	Bosmina		97.86	0	0	0	0	1	0	0	0	0	0
OTU_147	1	Arthropoda	Branchiopoda	Anomopoda	Daphniidae	Daphnia	mendotae	98.15	0	0	0	0	0	0	0	1	0	0
OTU_148	1	Arthropoda	Copepoda	Calanoida	Diaptomidae	Eudiaptomus	gracilis	98.08	0	0	0	0	0	0	0	1	0	0
OTU_149	2	Arthropoda	Branchiopoda	Anomopoda	Daphniidae	Daphnia		97.04	0	1	0	0	0	0	0	1	0	0
OTU_150	5	Arthropoda	Branchiopoda	Anomopoda	Daphniidae	Daphnia	galeata	100	0	1	0	0	0	2	0	1	1	0
OTU_151	2	Arthropoda	Copepoda	Cyclopoida	Cyclopidae	Cyclops		95.24	2	0	0	0	0	0	0	0	0	0
OTU_152	1	Arthropoda	Copepoda	Calanoida	Diaptomidae	Eudiaptomus		96.3	1	0	0	0	0	0	0	0	0	0
OTU_153	1	Arthropoda	Branchiopoda	Anomopoda	Daphniidae	Daphnia		97.78	0	1	0	0	0	0	0	0	0	0
OTU_154	1	Arthropoda	Branchiopoda	Anomopoda	Bosminidae	Bosmina		95.28	0	1	0	0	0	0	0	0	0	0
OTU_155	5	Arthropoda	Branchiopoda	Anomopoda	Daphniidae			91.99	0	1	1	1	0	1	0	0	1	0
OTU_156	7	Annelida	Clitellata					80.23	0	0	0	7	0	0	0	0	0	0
OTU_157	3	Proteobacteria	Alphaproteobacteria					72.58	0	0	0	0	0	0	0	1	1	1
OTU_158	2	Arthropoda	Branchiopoda	Anomopoda	Daphniidae	Daphnia		97.78	0	0	0	0	0	1	0	0	1	0
OTU_159	3	No Match	No Match	No Match	No Match	No Match	No Match		0	0	0	0	0	0	0	0	0	3
OTU_160	1	Arthropoda	Branchiopoda	Anomopoda	Daphniidae	Daphnia		96.63	0	1	0	0	0	0	0	0	0	0
OTU_161	1	Arthropoda	Branchiopoda	Anomopoda	Daphniidae			93.94	0	1	0	0	0	0	0	0	0	0
OTU_162	1	Arthropoda	Copepoda	Cyclopoida	Cyclopidae			94.2	0	1	0	0	0	0	0	0	0	0
OTU_163	1	Arthropoda	Branchiopoda	Anomopoda	Daphniidae	Daphnia		97.78	0	0	0	0	0	1	0	0	0	0
OTU_164	1	Arthropoda	Copepoda	Calanoida	Diaptomidae	Eudiaptomus		97.95	0	0	0	0	0	0	0	1	0	0
OTU_165	4	Arthropoda	Branchiopoda	Anomopoda	Daphniidae			92.95	0	2	0	0	0	1	0	1	0	0
OTU_166	1	Arthropoda	Branchiopoda	Anomopoda	Daphniidae	Daphnia		95.83	0	0	0	0	0	0	0	0	1	0
OTU_167	1	Arthropoda	Copepoda	Calanoida	Diaptomidae	Eudiaptomus	gracilis	98.15	0	0	0	0	0	0	0	0	1	0
OTU_168	2	Arthropoda	Copepoda	Calanoida	Diaptomidae	Eudiaptomus		97.88	0	0	0	1	0	0	0	0	1	0
OTU_169	1	Arthropoda	Copepoda	Calanoida	Diaptomidae	Eudiaptomus	gracilis	98.08	0	0	0	0	0	0	0	0	0	1
OTU_170	1	Arthropoda	Copepoda	Calanoida	Diaptomidae	Eudiaptomus		96.8	1	0	0	0	0	0	0	0	0	0
OTU_171	1	Arthropoda	Branchiopoda	Anomopoda	Daphniidae			91.67	1	0	0	0	0	0	0	0	0	0
OTU_172	1	Arthropoda	Branchiopoda	Anomopoda	Daphniidae	Daphnia		96.67	1	0	0	0	0	0	0	0	0	0
OTU_173	1	No Match	No Match	No Match	No Match	No Match	No Match		1	0	0	0	0	0	0	0	0	0
OTU_174	1	Arthropoda	Branchiopoda	Anomopoda	Daphniidae	Daphnia		95.88	1	0	0	0	0	0	0	0	0	0
OTU_175	1	Arthropoda	Branchiopoda	Anomopoda	Daphniidae	Daphnia		97.75	0	1	0	0	0	0	0	0	0	0
OTU_176	1	Arthropoda	Branchiopoda	Anomopoda	Daphniidae	Daphnia		95.17	0	1	0	0	0	0	0	0	0	0
OTU_177	1	Arthropoda	Branchiopoda	Anomopoda	Daphniidae	Daphnia	galeata	98.33	0	1	0	0	0	0	0	0	0	0
OTU_178	1	Arthropoda	Branchiopoda	Anomopoda	Bosminidae	Bosmina		96.46	0	1	0	0	0	0	0	0	0	0
OTU_179	1	Arthropoda	Branchiopoda	Anomopoda	Bosminidae	Bosmina		97.9	0	0	0	1	0	0	0	0	0	0
OTU_180	1	Arthropoda	Branchiopoda	Anomopoda	Bosminidae	Bosmina		97.2	0	0	0	1	0	0	0	0	0	0
OTU_181	1	Arthropoda	Branchiopoda	Anomopoda	Daphniidae	Daphnia		95.91	0	0	0	0	1	0	0	0	0	0
OTU_182	2	Arthropoda	Branchiopoda	Anomopoda	Daphniidae	Daphnia	galeata	99.57	0	0	1	0	1	0	0	0	0	0
OTU_183	1	Arthropoda	Branchiopoda	Anomopoda	Daphniidae	Daphnia		97.78	0	0	0	0	1	0	0	0	0	0
OTU_184	1	Arthropoda	Branchiopoda	Anomopoda	Bosminidae	Bosmina		97.62	0	0	0	0	0	0	1	0	0	0
OTU_185	2	No Match	No Match	No Match	No Match	No Match	No Match		0	0	0	0	0	0	0	2	0	0
OTU_186	1	Arthropoda	Branchiopoda	Anomopoda	Daphniidae	Daphnia	laevis	99.13	0	0	0	0	0	0	0	1	0	0
OTU_187	3	No Match	No Match	No Match	No Match	No Match	No Match		0	0	0	0	0	0	0	3	0	0
OTU_188	1	Arthropoda	Copepoda	Calanoida	Diaptomidae	Eudiaptomus	gracilis	98.17	0	0	0	0	0	0	0	0	1	0
OTU_189	1	Arthropoda	Copepoda	Calanoida	Diaptomidae	Eudiaptomus		97.99	0	0	0	0	0	0	0	0	1	0
OTU_190	1	No Match	No Match	No Match	No Match	No Match	No Match		1	0	0	0	0	0	0	0	0	0
OTU_191	1	No Match	No Match	No Match	No Match	No Match	No Match		1	0	0	0	0	0	0	0	0	0
OTU_192	1	Arthropoda	Branchiopoda	Ctenopoda	Sididae	Diaphanosoma		96.25	1	0	0	0	0	0	0	0	0	0
OTU_193	1	Arthropoda	Branchiopoda	Anomopoda	Daphniidae	Daphnia	laevis	98.48	0	1	0	0	0	0	0	0	0	0
OTU_194	1	Arthropoda	Copepoda	Calanoida	Diaptomidae	Eudiaptomus		97.4	0	1	0	0	0	0	0	0	0	0
OTU_195	1	Arthropoda	Branchiopoda	Anomopoda	Daphniidae	Daphnia		97.78	0	1	0	0	0	0	0	0	0	0
OTU_196	1	Arthropoda	Copepoda	Calanoida	Diaptomidae	Eudiaptomus		96.97	0	1	0	0	0	0	0	0	0	0
OTU_197	1	Arthropoda	Branchiopoda	Anomopoda	Bosminidae	Bosmina		97.25	0	0	1	0	0	0	0	0	0	0
OTU_198	1	No Match	No Match	No Match	No Match	No Match	No Match		0	0	0	1	0	0	0	0	0	0
OTU_199	1	Arthropoda	Copepoda	Calanoida	Diaptomidae	Eudiaptomus		96.83	0	0	0	0	1	0	0	0	0	0
OTU_200	1	No Match	No Match	No Match	No Match	No Match	No Match		0	0	0	0	0	1	0	0	0	0
OTU_201	1	Arthropoda	Branchiopoda	Anomopoda	Bosminidae	Eubosmina		97.25	0	0	0	0	0	0	1	0	0	0
OTU_202	1	Arthropoda	Copepoda	Cyclopoida	Cyclopidae	Cyclops		95.47	0	0	0	0	0	0	1	0	0	0
OTU_203	1	No Match	No Match	No Match	No Match	No Match	No Match		0	0	0	0	0	0	1	0	0	0
OTU_204	19	Arthropoda	Branchiopoda	Anomopoda	Daphniidae	Daphnia	galeata	98.08	0	3	1	5	1	0	3	2	3	1
OTU_205	1	Arthropoda	Copepoda	Calanoida	Diaptomidae	Eudiaptomus	gracilis	98.13	0	0	0	0	0	0	0	0	1	0
OTU_206	1	Arthropoda	Branchiopoda	Anomopoda	Daphniidae	Daphnia	laevis	98.13	0	0	0	0	0	0	0	0	1	0
OTU_207	1	Annelida	Clitellata					74.07	0	0	0	0	0	0	0	0	0	1
OTU_208	1	Arthropoda	Branchiopoda	Anomopoda	Bosminidae	Bosmina		95.32	1	0	0	0	0	0	0	0	0	0
OTU_209	1	Arthropoda	Copepoda	Calanoida	Diaptomidae	Eudiaptomus		96.1	1	0	0	0	0	0	0	0	0	0
OTU_210	1	Arthropoda	Branchiopoda	Anomopoda	Daphniidae	Daphnia		97.04	0	1	0	0	0	0	0	0	0	0
OTU_211	1	Arthropoda	Branchiopoda	Anomopoda	Daphniidae	Daphnia		96.03	0	1	0	0	0	0	0	0	0	0
OTU_212	1	Arthropoda	Branchiopoda	Anomopoda	Daphniidae	Daphnia		97.78	0	1	0	0	0	0	0	0	0	0
OTU_213	1	Arthropoda	Branchiopoda	Anomopoda	Bosminidae	Bosmina		95.28	0	1	0	0	0	0	0	0	0	0
OTU_214	1	Arthropoda	Branchiopoda	Anomopoda	Daphniidae			92.35	0	1	0	0	0	0	0	0	0	0
OTU_215	1	Arthropoda	Branchiopoda	Anomopoda	Daphniidae	Daphnia		97.73	0	0	1	0	0	0	0	0	0	0
OTU_216	1	Arthropoda	Branchiopoda	Anomopoda	Bosminidae	Bosmina		95.09	0	0	1	0	0	0	0	0	0	0
OTU_217	1	Arthropoda	Copepoda	Cyclopoida	Cyclopidae	Cyclops		95.67	0	0	1	0	0	0	0	0	0	0
OTU_218	2	Arthropoda	Branchiopoda	Anomopoda	Daphniidae			94.1	0	0	1	0	1	0	0	0	0	0
OTU_219	1	Arthropoda	Branchiopoda	Onychopoda	Cercopagididae			93.29	0	0	0	0	1	0	0	0	0	0
OTU_220	1	Arthropoda	Branchiopoda	Anomopoda	Daphniidae	Daphnia		96.67	0	0	0	0	1	0	0	0	0	0
OTU_221	1	Arthropoda	Branchiopoda	Anomopoda	Bosminidae	Bosmina		97.05	0	0	0	0	1	0	0	0	0	0
OTU_222	1	Arthropoda	Branchiopoda	Anomopoda	Daphniidae	Daphnia		97.41	0	0	0	0	1	0	0	0	0	0
OTU_223	1	Arthropoda	Branchiopoda	Anomopoda	Daphniidae			93.33	0	0	0	0	1	0	0	0	0	0
OTU_224	1	Arthropoda	Branchiopoda	Anomopoda	Daphniidae	Daphnia		97.78	0	0	0	0	0	1	0	0	0	0
OTU_225	1	Arthropoda	Branchiopoda	Anomopoda	Daphniidae	Daphnia		96.97	0	0	0	0	0	0	0	1	0	0
OTU_226	1	Arthropoda	Branchiopoda	Anomopoda	Daphniidae	Daphnia		96	0	0	0	0	0	0	0	0	1	0
OTU_227	1	Arthropoda	Branchiopoda	Anomopoda	Daphniidae	Daphnia		97.73	0	0	0	0	0	0	0	0	1	0
OTU_228	1	Arthropoda	Branchiopoda	Anomopoda	Bosminidae	Bosmina		97.29	0	0	0	0	0	0	0	0	1	0
OTU_229	1	Arthropoda	Branchiopoda	Anomopoda	Daphniidae	Daphnia	mendotae	99.58	0	0	0	0	0	0	0	0	1	0
OTU_230	1	Arthropoda	Branchiopoda	Anomopoda	Daphniidae	Daphnia	mendotae	98.08	0	0	0	0	0	0	0	0	1	0
OTU_231	1	Arthropoda	Branchiopoda	Anomopoda	Daphniidae	Daphnia		95.45	0	0	0	0	0	0	0	0	1	0
OTU_232	1	Arthropoda	Branchiopoda	Anomopoda	Daphniidae	Daphnia	laevis	98.11	0	0	0	0	0	0	0	0	1	0
OTU_233	1	Arthropoda	Copepoda	Calanoida	Diaptomidae	Eudiaptomus		97.2	0	0	0	0	0	0	0	0	0	1
OTU_234	1	Arthropoda	Insecta	Diptera	Chironomidae	Sergentia	coracina	99.62	1	0	0	0	0	0	0	0	0	0
OTU_235	3	No Match	No Match	No Match	No Match	No Match	No Match		1	0	0	1	0	0	0	0	1	0
OTU_236	1	No Match	No Match	No Match	No Match	No Match	No Match		1	0	0	0	0	0	0	0	0	0
OTU_237	1	Arthropoda	Branchiopoda	Anomopoda	Daphniidae	Daphnia	galeata	99.57	1	0	0	0	0	0	0	0	0	0
OTU_238	2	No Match	No Match	No Match	No Match	No Match	No Match		1	0	0	0	0	0	0	0	1	0
OTU_239	1	No Match	No Match	No Match	No Match	No Match	No Match		1	0	0	0	0	0	0	0	0	0
OTU_240	1	No Match	No Match	No Match	No Match	No Match	No Match		1	0	0	0	0	0	0	0	0	0
OTU_241	1	No Match	No Match	No Match	No Match	No Match	No Match		1	0	0	0	0	0	0	0	0	0
OTU_242	1	Arthropoda	Branchiopoda	Anomopoda	Daphniidae	Daphnia		95.19	0	1	0	0	0	0	0	0	0	0
OTU_243	1	Arthropoda	Branchiopoda	Anomopoda	Daphniidae	Daphnia		97.73	0	1	0	0	0	0	0	0	0	0
OTU_244	1	Arthropoda	Branchiopoda	Anomopoda	Daphniidae	Daphnia	laevis	98.77	0	1	0	0	0	0	0	0	0	0
OTU_245	1	Arthropoda	Branchiopoda	Anomopoda	Daphniidae			91.58	0	1	0	0	0	0	0	0	0	0
OTU_246	1	Arthropoda	Branchiopoda	Anomopoda	Daphniidae	Daphnia		95.19	0	1	0	0	0	0	0	0	0	0
OTU_247	1	Arthropoda	Copepoda	Calanoida	Diaptomidae	Eudiaptomus		96.88	0	0	1	0	0	0	0	0	0	0
OTU_248	1	Arthropoda	Copepoda	Cyclopoida	Cyclopidae			93.51	0	0	1	0	0	0	0	0	0	0
OTU_249	1	Arthropoda	Branchiopoda	Anomopoda	Daphniidae	Daphnia		96.63	0	0	1	0	0	0	0	0	0	0
OTU_250	1	Arthropoda	Branchiopoda	Anomopoda	Daphniidae	Daphnia		96.3	0	0	1	0	0	0	0	0	0	0
OTU_251	1	Arthropoda	Branchiopoda	Ctenopoda	Sididae			92.88	0	0	1	0	0	0	0	0	0	0
OTU_252	1	No Match	No Match	No Match	No Match	No Match	No Match		0	0	1	0	0	0	0	0	0	0
OTU_253	1	No Match	No Match	No Match	No Match	No Match	No Match		0	0	1	0	0	0	0	0	0	0
OTU_254	1	Arthropoda	Branchiopoda	Anomopoda	Daphniidae			92.54	0	0	1	0	0	0	0	0	0	0
OTU_255	1	Arthropoda	Branchiopoda	Anomopoda	Bosminidae	Bosmina		97.37	0	0	0	1	0	0	0	0	0	0
OTU_256	1	Arthropoda	Branchiopoda	Anomopoda	Daphniidae	Daphnia		97.78	0	0	0	1	0	0	0	0	0	0
OTU_257	1	Arthropoda	Branchiopoda	Anomopoda	Daphniidae	Daphnia		97.25	0	0	0	1	0	0	0	0	0	0
OTU_258	1	Arthropoda	Branchiopoda	Anomopoda	Daphniidae	Daphnia		97.38	0	0	0	1	0	0	0	0	0	0
OTU_259	1	No Match	No Match	No Match	No Match	No Match	No Match		0	0	0	1	0	0	0	0	0	0
OTU_260	1	Arthropoda	Branchiopoda	Anomopoda	Daphniidae	Daphnia	laevis	98.48	0	0	0	1	0	0	0	0	0	0
OTU_261	1	Arthropoda	Branchiopoda	Anomopoda	Daphniidae	Daphnia		95.19	0	0	0	1	0	0	0	0	0	0
OTU_262	1	Arthropoda	Branchiopoda	Anomopoda	Daphniidae	Daphnia		97.04	0	0	0	1	0	0	0	0	0	0
OTU_263	1	No Match	No Match	No Match	No Match	No Match	No Match		0	0	0	1	0	0	0	0	0	0
OTU_264	1	Arthropoda	Branchiopoda	Anomopoda	Bosminidae			91.39	0	0	0	0	1	0	0	0	0	0
OTU_265	1	Arthropoda	Branchiopoda	Anomopoda	Daphniidae			92.96	0	0	0	0	1	0	0	0	0	0
OTU_266	1	Arthropoda	Branchiopoda	Anomopoda	Daphniidae	Daphnia		96.67	0	0	0	0	1	0	0	0	0	0
OTU_267	1	Arthropoda	Branchiopoda	Ctenopoda	Sididae			90	0	0	0	0	1	0	0	0	0	0
OTU_268	3	Arthropoda	Branchiopoda	Anomopoda	Daphniidae	Daphnia		97.35	0	0	0	0	3	0	0	0	0	0
OTU_269	1	Arthropoda	Branchiopoda	Anomopoda	Daphniidae	Daphnia		96.67	0	0	0	0	1	0	0	0	0	0
OTU_270	1	Arthropoda	Branchiopoda	Anomopoda	Daphniidae	Daphnia		96.93	0	0	0	0	0	1	0	0	0	0
OTU_271	1	Arthropoda	Branchiopoda	Anomopoda	Daphniidae	Daphnia	laevis	98.11	0	0	0	0	0	1	0	0	0	0
OTU_272	1	No Match	No Match	No Match	No Match	No Match	No Match		0	0	0	0	0	1	0	0	0	0
OTU_273	1	Arthropoda	Branchiopoda	Anomopoda	Bosminidae	Eubosmina		96.17	0	0	0	0	0	1	0	0	0	0
OTU_274	1	Arthropoda	Branchiopoda	Anomopoda	Daphniidae	Daphnia		97.75	0	0	0	0	0	1	0	0	0	0
OTU_275	1	Arthropoda	Branchiopoda	Anomopoda	Daphniidae	Daphnia	laevis	98.41	0	0	0	0	0	0	1	0	0	0
OTU_276	1	No Match	No Match	No Match	No Match	No Match	No Match		0	0	0	0	0	0	1	0	0	0
OTU_277	1	Arthropoda	Branchiopoda	Anomopoda	Bosminidae	Eubosmina		97.55	0	0	0	0	0	0	1	0	0	0
OTU_278	1	Arthropoda	Branchiopoda	Anomopoda	Bosminidae			94.99	0	0	0	0	0	0	1	0	0	0
OTU_279	1	No Match	No Match	No Match	No Match	No Match	No Match		0	0	0	0	0	0	1	0	0	0
OTU_280	1	No Match	No Match	No Match	No Match	No Match	No Match		0	0	0	0	0	0	1	0	0	0
OTU_281	3	No Match	No Match	No Match	No Match	No Match	No Match		0	0	0	0	0	0	0	3	0	0
OTU_282	1	No Match	No Match	No Match	No Match	No Match	No Match		0	0	0	0	0	0	0	1	0	0
OTU_283	1	Arthropoda	Branchiopoda	Anomopoda	Daphniidae	Daphnia		97.77	0	0	0	0	0	0	0	1	0	0
OTU_284	1	Arthropoda	Branchiopoda	Anomopoda	Daphniidae			92.8	0	0	0	0	0	0	0	1	0	0
OTU_285	1	Arthropoda	Branchiopoda	Anomopoda	Bosminidae	Bosmina		96.33	0	0	0	0	0	0	0	1	0	0
OTU_286	1	Arthropoda	Branchiopoda	Anomopoda	Daphniidae	Daphnia		97.41	0	0	0	0	0	0	0	1	0	0
OTU_287	1	Arthropoda	Branchiopoda	Anomopoda	Bosminidae	Bosmina		97.11	0	0	0	0	0	0	0	0	1	0
OTU_288	1	Arthropoda	Copepoda	Calanoida	Diaptomidae	Eudiaptomus	gracilis	98.13	0	0	0	0	0	0	0	0	1	0
OTU_289	1	No Match	No Match	No Match	No Match	No Match	No Match		0	0	0	0	0	0	0	0	1	0
OTU_290	2	Arthropoda	Branchiopoda	Anomopoda	Daphniidae			93.06	0	0	0	1	0	0	0	0	1	0
OTU_291	1	Arthropoda	Branchiopoda	Anomopoda	Bosminidae	Bosmina		96.64	0	0	0	0	0	0	0	0	1	0
OTU_292	1	Arthropoda	Branchiopoda	Anomopoda				89.42	0	0	0	0	0	0	0	0	1	0
OTU_293	1	Arthropoda	Copepoda	Calanoida	Diaptomidae	Eudiaptomus		96.26	0	0	0	0	0	0	0	0	0	1
OTU_294	1	Arthropoda	Copepoda	Calanoida	Diaptomidae	Eudiaptomus	gracilis	98.39	0	0	0	0	0	0	0	0	0	1
OTU_295	2	No Match	No Match	No Match	No Match	No Match	No Match		0	0	0	0	0	0	0	0	0	2
OTU_296	1	No Match	No Match	No Match	No Match	No Match	No Match		1	0	0	0	0	0	0	0	0	0
OTU_297	1	No Match	No Match	No Match	No Match	No Match	No Match		1	0	0	0	0	0	0	0	0	0
OTU_298	1	No Match	No Match	No Match	No Match	No Match	No Match		1	0	0	0	0	0	0	0	0	0
OTU_299	1	No Match	No Match	No Match	No Match	No Match	No Match		1	0	0	0	0	0	0	0	0	0
OTU_300	1	Arthropoda	Branchiopoda	Anomopoda	Daphniidae	Daphnia		95.9	1	0	0	0	0	0	0	0	0	0
OTU_301	1	Arthropoda	Branchiopoda	Anomopoda	Bosminidae			94.8	1	0	0	0	0	0	0	0	0	0
OTU_302	1	No Match	No Match	No Match	No Match	No Match	No Match		1	0	0	0	0	0	0	0	0	0
OTU_303	1	No Match	No Match	No Match	No Match	No Match	No Match		1	0	0	0	0	0	0	0	0	0
OTU_304	1	Arthropoda	Copepoda	Cyclopoida				85.71	1	0	0	0	0	0	0	0	0	0
OTU_305	1	No Match	No Match	No Match	No Match	No Match	No Match		1	0	0	0	0	0	0	0	0	0
OTU_306	1	No Match	No Match	No Match	No Match	No Match	No Match		1	0	0	0	0	0	0	0	0	0
OTU_307	1	Arthropoda	Branchiopoda	Anomopoda	Daphniidae	Daphnia		97.04	1	0	0	0	0	0	0	0	0	0
OTU_308	1	No Match	No Match	No Match	No Match	No Match	No Match		1	0	0	0	0	0	0	0	0	0
OTU_309	1	No Match	No Match	No Match	No Match	No Match	No Match		1	0	0	0	0	0	0	0	0	0
OTU_310	1	No Match	No Match	No Match	No Match	No Match	No Match		1	0	0	0	0	0	0	0	0	0
OTU_311	1	No Match	No Match	No Match	No Match	No Match	No Match		1	0	0	0	0	0	0	0	0	0
OTU_312	1	No Match	No Match	No Match	No Match	No Match	No Match		1	0	0	0	0	0	0	0	0	0
OTU_313	1	No Match	No Match	No Match	No Match	No Match	No Match		1	0	0	0	0	0	0	0	0	0
OTU_314	1	Arthropoda	Branchiopoda	Anomopoda	Daphniidae	Daphnia		97.73	0	1	0	0	0	0	0	0	0	0
OTU_315	1	Arthropoda	Branchiopoda	Anomopoda	Daphniidae			91.67	0	1	0	0	0	0	0	0	0	0
OTU_316	1	Arthropoda	Copepoda	Cyclopoida	Cyclopidae			93.86	0	1	0	0	0	0	0	0	0	0
OTU_317	1	No Match	No Match	No Match	No Match	No Match	No Match		0	1	0	0	0	0	0	0	0	0
OTU_318	1	Arthropoda	Branchiopoda	Anomopoda	Daphniidae	Daphnia		97.41	0	1	0	0	0	0	0	0	0	0
OTU_319	1	Arthropoda	Branchiopoda	Anomopoda	Daphniidae			93.8	0	1	0	0	0	0	0	0	0	0
OTU_320	1	Arthropoda	Branchiopoda	Anomopoda	Daphniidae	Daphnia		97.12	0	1	0	0	0	0	0	0	0	0
OTU_321	1	Arthropoda	Branchiopoda	Anomopoda	Daphniidae	Daphnia		97.73	0	1	0	0	0	0	0	0	0	0
OTU_322	1	Arthropoda	Branchiopoda	Anomopoda	Daphniidae			91.85	0	1	0	0	0	0	0	0	0	0
OTU_323	1	Arthropoda	Copepoda	Calanoida	Diaptomidae	Eudiaptomus		96.48	0	0	1	0	0	0	0	0	0	0
OTU_324	1	Arthropoda	Branchiopoda	Anomopoda	Daphniidae	Daphnia	galeata	98.35	0	0	1	0	0	0	0	0	0	0
OTU_325	1	Arthropoda	Branchiopoda	Anomopoda	Daphniidae	Daphnia		97.04	0	0	1	0	0	0	0	0	0	0
OTU_326	1	No Match	No Match	No Match	No Match	No Match	No Match		0	0	1	0	0	0	0	0	0	0
OTU_327	1	Arthropoda	Branchiopoda	Anomopoda	Daphniidae			92.13	0	0	1	0	0	0	0	0	0	0
OTU_328	1	Arthropoda	Branchiopoda	Anomopoda	Bosminidae	Eubosmina		95.87	0	0	1	0	0	0	0	0	0	0
OTU_329	1	Arthropoda	Branchiopoda	Anomopoda	Daphniidae	Daphnia		97.4	0	0	1	0	0	0	0	0	0	0
OTU_330	1	Arthropoda	Branchiopoda	Anomopoda				89.77	0	0	1	0	0	0	0	0	0	0
OTU_331	1	Arthropoda	Branchiopoda	Anomopoda	Daphniidae			92.59	0	0	1	0	0	0	0	0	0	0
OTU_332	1	Arthropoda	Branchiopoda	Anomopoda	Daphniidae	Daphnia		97.77	0	0	1	0	0	0	0	0	0	0
OTU_333	1	Arthropoda	Branchiopoda	Anomopoda	Bosminidae	Eubosmina		96.33	0	0	1	0	0	0	0	0	0	0
OTU_334	1	No Match	No Match	No Match	No Match	No Match	No Match		0	0	1	0	0	0	0	0	0	0
OTU_335	1	Arthropoda	Branchiopoda	Anomopoda	Daphniidae	Daphnia		96.97	0	0	0	1	0	0	0	0	0	0
OTU_336	1	Arthropoda	Branchiopoda	Anomopoda	Daphniidae	Daphnia		97.78	0	0	0	1	0	0	0	0	0	0
OTU_337	1	Arthropoda	Branchiopoda	Anomopoda	Bosminidae	Bosmina		97.32	0	0	0	1	0	0	0	0	0	0
OTU_338	1	Arthropoda	Branchiopoda	Anomopoda	Bosminidae	Eubosmina		96.23	0	0	0	1	0	0	0	0	0	0
OTU_339	1	No Match	No Match	No Match	No Match	No Match	No Match		0	0	0	1	0	0	0	0	0	0
OTU_340	1	Arthropoda	Branchiopoda	Anomopoda	Daphniidae	Daphnia		95.17	0	0	0	1	0	0	0	0	0	0
OTU_341	1	Arthropoda	Branchiopoda	Anomopoda	Daphniidae	Daphnia	laevis	98.11	0	0	0	0	1	0	0	0	0	0
OTU_342	1	Arthropoda	Branchiopoda	Anomopoda	Bosminidae	Bosmina		97.32	0	0	0	0	1	0	0	0	0	0
OTU_343	1	Ochrophyta	Chrysophyceae					73.43	0	0	0	0	1	0	0	0	0	0
OTU_344	1	Arthropoda	Copepoda	Calanoida	Diaptomidae	Eudiaptomus		96.3	0	0	0	0	1	0	0	0	0	0
OTU_345	1	Arthropoda	Branchiopoda	Anomopoda	Daphniidae	Daphnia		96.25	0	0	0	0	1	0	0	0	0	0
OTU_346	1	Arthropoda	Branchiopoda	Anomopoda	Daphniidae	Daphnia	laevis	98.08	0	0	0	0	1	0	0	0	0	0
OTU_347	1	Chordata	Actinopterygii					68.82	0	0	0	0	1	0	0	0	0	0
OTU_348	1	Arthropoda	Branchiopoda	Anomopoda	Daphniidae	Daphnia		95.87	0	0	0	0	1	0	0	0	0	0
OTU_349	1	Arthropoda	Branchiopoda	Anomopoda	Daphniidae			93.39	0	0	0	0	1	0	0	0	0	0
OTU_350	1	Arthropoda	Branchiopoda	Anomopoda	Daphniidae	Daphnia		97.75	0	0	0	0	1	0	0	0	0	0
OTU_351	1	Arthropoda	Branchiopoda	Anomopoda	Bosminidae	Bosmina		95.45	0	0	0	0	1	0	0	0	0	0
OTU_352	1	Arthropoda	Branchiopoda	Anomopoda	Daphniidae	Daphnia		97.78	0	0	0	0	0	1	0	0	0	0
OTU_353	1	Arthropoda	Branchiopoda	Anomopoda	Bosminidae	Eubosmina		95.27	0	0	0	0	0	1	0	0	0	0
OTU_354	1	Arthropoda	Branchiopoda	Anomopoda	Daphniidae			94.97	0	0	0	0	0	1	0	0	0	0
OTU_355	1	Arthropoda	Branchiopoda	Anomopoda	Daphniidae	Daphnia		97.75	0	0	0	0	0	1	0	0	0	0
OTU_356	1	Arthropoda	Branchiopoda	Anomopoda	Daphniidae	Daphnia		96.88	0	0	0	0	0	1	0	0	0	0
OTU_357	1	Arthropoda	Branchiopoda	Anomopoda	Daphniidae	Daphnia	laevis	98.45	0	0	0	0	0	1	0	0	0	0
OTU_358	2	Arthropoda	Branchiopoda	Anomopoda	Daphniidae	Daphnia		95.16	0	0	0	0	0	1	0	1	0	0
OTU_359	1	Arthropoda	Insecta					70.93	0	0	0	0	0	0	1	0	0	0
OTU_360	1	Arthropoda	Branchiopoda	Anomopoda	Bosminidae	Bosmina		98.23	0	0	0	0	0	0	1	0	0	0
OTU_361	1	Arthropoda	Branchiopoda	Anomopoda	Bosminidae	Bosmina		95.19	0	0	0	0	0	0	1	0	0	0
OTU_362	1	Arthropoda	Branchiopoda	Anomopoda	Daphniidae	Daphnia		97.41	0	0	0	0	0	0	1	0	0	0
OTU_363	1	No Match	No Match	No Match	No Match	No Match	No Match		0	0	0	0	0	0	1	0	0	0
OTU_364	1	Arthropoda	Copepoda	Calanoida	Diaptomidae	Eudiaptomus		97.6	0	0	0	0	0	0	1	0	0	0
OTU_365	1	Arthropoda	Copepoda	Cyclopoida				89.85	0	0	0	0	0	0	1	0	0	0
OTU_366	2	No Match	No Match	No Match	No Match	No Match	No Match		0	0	0	0	0	0	0	2	0	0
OTU_367	1	Arthropoda	Branchiopoda	Anomopoda	Daphniidae			94.07	0	0	0	0	0	0	0	1	0	0
OTU_368	1	Arthropoda	Branchiopoda	Anomopoda	Daphniidae	Daphnia		96.25	0	0	0	0	0	0	0	1	0	0
OTU_369	1	Arthropoda	Branchiopoda	Anomopoda	Daphniidae	Daphnia		96.25	0	0	0	0	0	0	0	1	0	0
OTU_370	1	No Match	No Match	No Match	No Match	No Match	No Match		0	0	0	0	0	0	0	1	0	0
OTU_371	1	Arthropoda	Copepoda	Calanoida	Diaptomidae	Eudiaptomus		97.57	0	0	0	0	0	0	0	1	0	0
OTU_372	1	Arthropoda	Copepoda	Cyclopoida	Cyclopidae	Cyclops		96.15	0	0	0	0	0	0	0	1	0	0
OTU_373	1	No Match	No Match	No Match	No Match	No Match	No Match		0	0	0	0	0	0	0	1	0	0
OTU_374	1	Arthropoda	Copepoda	Calanoida	Diaptomidae	Eudiaptomus		96.77	0	0	0	0	0	0	0	1	0	0
OTU_375	1	No Match	No Match	No Match	No Match	No Match	No Match		0	0	0	0	0	0	0	1	0	0
OTU_376	1	Arthropoda	Branchiopoda	Haplopoda	Leptodoridae	Leptodora	kindtii	98.17	0	0	0	0	0	0	0	1	0	0
OTU_377	1	No Match	No Match	No Match	No Match	No Match	No Match		0	0	0	0	0	0	0	1	0	0
OTU_378	1	Arthropoda	Branchiopoda	Anomopoda	Daphniidae			94.12	0	0	0	0	0	0	0	1	0	0
OTU_379	2	Arthropoda	Branchiopoda	Anomopoda	Daphniidae	Daphnia		97	0	0	0	0	0	0	0	1	1	0
OTU_380	1	No Match	No Match	No Match	No Match	No Match	No Match		0	0	0	0	0	0	0	1	0	0
OTU_381	1	Arthropoda	Branchiopoda	Ctenopoda	Sididae			93.16	0	0	0	0	0	0	0	1	0	0
OTU_382	1	Arthropoda	Branchiopoda	Anomopoda	Daphniidae	Daphnia		95.91	0	0	0	0	0	0	0	1	0	0
OTU_383	1	Arthropoda	Copepoda	Calanoida	Diaptomidae	Eudiaptomus		97.58	0	0	0	0	0	0	0	1	0	0
OTU_384	3	Arthropoda	Branchiopoda	Anomopoda	Daphniidae	Daphnia	galeata	99.16	0	0	2	0	0	0	0	1	0	0
OTU_385	1	Arthropoda	Branchiopoda	Anomopoda	Daphniidae			92.66	0	0	0	0	0	0	0	1	0	0
OTU_386	1	Arthropoda	Copepoda	Cyclopoida	Cyclopidae	Cyclops		96.88	0	0	0	0	0	0	0	0	1	0
OTU_387	2	Arthropoda	Branchiopoda	Anomopoda	Daphniidae	Daphnia	galeata	99.17	0	0	1	0	0	0	0	0	1	0
OTU_388	1	Arthropoda	Copepoda	Calanoida	Diaptomidae	Eudiaptomus		95.16	0	0	0	0	0	0	0	0	1	0
OTU_389	1	Arthropoda	Branchiopoda	Anomopoda	Daphniidae	Daphnia	galeata	99.58	0	0	0	0	0	0	0	0	1	0
OTU_390	1	Arthropoda	Branchiopoda	Anomopoda	Daphniidae	Daphnia	laevis	99.18	0	0	0	0	0	0	0	0	1	0
OTU_391	1	Arthropoda	Branchiopoda	Anomopoda	Bosminidae	Eubosmina		96.79	0	0	0	0	0	0	0	0	1	0
OTU_392	1	Arthropoda	Branchiopoda	Anomopoda	Daphniidae	Daphnia	laevis	98.47	0	0	0	0	0	0	0	0	1	0
OTU_393	1	Arthropoda	Branchiopoda	Anomopoda	Bosminidae	Eubosmina		96.38	0	0	0	0	0	0	0	0	1	0
OTU_394	1	Arthropoda	Branchiopoda	Anomopoda	Daphniidae	Daphnia		96.67	0	0	0	0	0	0	0	0	1	0
OTU_395	1	Arthropoda	Branchiopoda	Anomopoda	Daphniidae	Daphnia		97.7	0	0	0	0	0	0	0	0	1	0
OTU_396	1	Arthropoda	Branchiopoda	Anomopoda	Bosminidae	Eubosmina		97.02	0	0	0	0	0	0	0	0	1	0
OTU_397	1	Arthropoda	Copepoda	Calanoida	Diaptomidae	Eudiaptomus		96.78	0	0	0	0	0	0	0	0	1	0
OTU_398	1	Arthropoda	Branchiopoda	Anomopoda	Daphniidae	Daphnia		97.78	0	0	0	0	0	0	0	0	1	0
OTU_399	2	Arthropoda	Copepoda	Calanoida	Diaptomidae	Eudiaptomus		97.74	0	0	1	0	0	0	0	0	1	0
OTU_400	1	Arthropoda	Branchiopoda	Anomopoda	Daphniidae			92.27	0	0	0	0	0	0	0	0	1	0
OTU_401	2	No Match	No Match	No Match	No Match	No Match	No Match		0	0	0	0	0	0	0	0	2	0
OTU_402	2	Arthropoda	Branchiopoda	Anomopoda	Daphniidae	Daphnia		95.83	0	0	0	0	0	0	0	1	1	0
OTU_403	1	Arthropoda	Branchiopoda	Anomopoda	Daphniidae	Daphnia	laevis	98.47	0	0	0	0	0	0	0	0	1	0
OTU_404	1	Arthropoda	Branchiopoda	Anomopoda	Daphniidae	Daphnia	galeata	98.35	0	0	0	0	0	0	0	0	1	0
OTU_405	1	Arthropoda	Branchiopoda	Anomopoda	Daphniidae	Daphnia		96.14	0	0	0	0	0	0	0	0	0	1
OTU_406	1	No Match	No Match	No Match	No Match	No Match	No Match		0	0	0	0	0	0	0	0	0	1
OTU_407	2	No Match	No Match	No Match	No Match	No Match	No Match		0	0	0	0	0	0	0	0	0	2
OTU_408	1	No Match	No Match	No Match	No Match	No Match	No Match		0	0	0	0	0	0	0	0	0	1
OTU_409	1	No Match	No Match	No Match	No Match	No Match	No Match		0	0	0	0	0	0	0	0	0	1
OTU_410	1	No Match	No Match	No Match	No Match	No Match	No Match		0	0	0	0	0	0	0	0	0	1
OTU_411	1	No Match	No Match	No Match	No Match	No Match	No Match		0	0	0	0	0	0	0	0	0	1
OTU_412	1	No Match	No Match	No Match	No Match	No Match	No Match		0	0	0	0	0	0	0	0	0	1
OTU_413	1	Arthropoda	Branchiopoda	Anomopoda	Bosminidae	Eubosmina		96.46	0	0	0	0	0	0	0	0	0	1
OTU_414	1	Arthropoda	Branchiopoda	Anomopoda	Daphniidae	Daphnia	laevis	98.08	0	0	0	0	0	0	0	0	0	1
OTU_415	1	Arthropoda	Copepoda	Calanoida	Diaptomidae	Eudiaptomus		97.62	0	0	0	0	0	0	0	0	0	1
OTU_416	1	No Match	No Match	No Match	No Match	No Match	No Match		0	0	0	0	0	0	0	0	0	1
OTU_417	1	Arthropoda	Copepoda	Calanoida	Diaptomidae	Eudiaptomus		96.83	0	0	0	0	0	0	0	0	0	1
OTU_418	1	No Match	No Match	No Match	No Match	No Match	No Match		0	0	0	0	0	0	0	0	0	1
OTU_419	1	Arthropoda	Copepoda	Calanoida	Diaptomidae	Eudiaptomus		97.58	0	0	0	0	0	0	0	0	0	1
OTU_420	1	Arthropoda	Branchiopoda	Anomopoda	Daphniidae	Daphnia		96.55	0	0	0	0	0	0	0	0	0	1
OTU_421	4	Arthropoda	Branchiopoda	Anomopoda	Daphniidae	Daphnia		95.53	0	0	0	2	0	0	0	0	1	1
