# Supplementary material for: Unraveling Zooplankton Diversity in a Pre-Alpine Lake: A Comparative Analysis of ZooScan and DNA Metabarcoding Methods
Source: MDPI journal article supplement (doi:10.3390/w16030411), 2024-01-26
Supplement: s1 [file s1 › Table S2.xlsx]

## Sheet: Tabelle1
sample	Taxa	read_log	ESD_biomass_log	maj_biomass_log	count_log
1	Bosmina spp.	2.61384	7.44038	7.84873	1.5563
2	Bosmina spp.	2.96237	7.51182	7.93014	1.4624
3	Bosmina spp.	2.57749	7.27942	7.66859	1.41497
4	Bosmina spp.	2.89708	7.72152	8.12188	1.78533
5	Bosmina spp.	2.83315	7.74422	8.19792	1.83251
6	Bosmina spp.	2.61909	7.70781	8.12532	1.86923
7	Bosmina spp.	3.00346	7.78025	8.21121	1.88649
8	Bosmina spp.	2.56229	7.50809	7.91091	1.66276
9	Bosmina spp.	2.5092	7.84113	8.2669	1.74819
10	Bosmina spp.	2.56937	7.63509	8.0748	1.76343
1	cyclopoid copepod	3.99029	8.06984	8.80625	2.02938
2	cyclopoid copepod	3.66904	7.98604	8.70558	1.97313
3	cyclopoid copepod	3.91913	7.90271	8.64265	1.86923
4	cyclopoid copepod	3.82491	8.01291	8.75116	1.98227
5	cyclopoid copepod	3.69399	8.00348	8.77663	1.93952
6	cyclopoid copepod	3.80801	7.90442	8.69159	1.90309
7	cyclopoid copepod	3.73368	8.00529	8.81074	2.04139
8	cyclopoid copepod	3.64058	8.08521	8.86473	2.04922
9	cyclopoid copepod	3.53732	7.9903	8.71529	1.99564
10	cyclopoid copepod	3.49541	7.89645	8.6739	1.89763
1	Daphnia spp.	3.59006	8.48699	9.0719	2.24055
2	Daphnia spp.	3.84776	8.69886	9.30584	2.37291
3	Daphnia spp.	3.74139	8.49721	9.05061	2.14613
4	Daphnia spp.	3.80017	8.6748	9.29256	2.36922
5	Daphnia spp.	3.74218	8.71596	9.31713	2.43933
6	Daphnia spp.	3.76641	8.59421	9.20117	2.3075
7	Daphnia spp.	3.77866	8.60333	9.18765	2.26482
8	Daphnia spp.	3.66624	8.79382	9.40317	2.50106
9	Daphnia spp.	3.73815	8.8425	9.43861	2.54531
10	Daphnia spp.	3.62138	8.74547	9.33538	2.4609
1	calanoid copepod	1.61278	7.85792	8.62776	1.74819
2	calanoid copepod	2.0086	7.95428	8.73536	1.86332
3	calanoid copepod	1.44716	7.8948	8.59561	1.83251
4	calanoid copepod	1.95904	8.3607	8.99491	2.24797
5	calanoid copepod	1.5682	8.21899	8.96366	2.10037
6	calanoid copepod	2.14922	8.0519	8.76175	1.95904
7	calanoid copepod	1.5563	8.17013	8.8686	2.08279
8	calanoid copepod	1.90309	8.21223	8.83101	2.12385
9	calanoid copepod	1.63347	8.22619	8.91002	2.15836
10	calanoid copepod	1.68124	8.39594	9.14954	2.29003
1	Bythotrephes longimanus	0	0	0	0
2	Bythotrephes longimanus	0.845098	7.41609	8.34923	0.60206
3	Bythotrephes longimanus	0	6.78128	7.97317	0.30103
4	Bythotrephes longimanus	0.69897	7.038	7.80943	0.30103
5	Bythotrephes longimanus	0.778151	7.38397	8.36719	0.60206
6	Bythotrephes longimanus	0.477121	6.79306	7.36408	0.30103
7	Bythotrephes longimanus	1	7.26792	8.07432	0.60206
8	Bythotrephes longimanus	1.14613	7.74267	8.39027	0.778151
9	Bythotrephes longimanus	1.34242	7.50736	8.36608	0.69897
10	Bythotrephes longimanus	0	7.61045	8.0193	0.477121
1	Leptodora kindtii	0	7.77396	8.59079	0.60206
2	Leptodora kindtii	1.81954	8.04321	8.71967	0.477121
3	Leptodora kindtii	1.57978	7.92034	8.43734	0.30103
4	Leptodora kindtii	1.59106	7.55975	8.23147	0.30103
5	Leptodora kindtii	1.20412	7.63167	8.30236	0.30103
6	Leptodora kindtii	1.62325	8.10879	8.77948	0.60206
7	Leptodora kindtii	2.02938	8.10879	8.77948	0.60206
8	Leptodora kindtii	1.95424	8.12387	8.79155	0.69897
9	Leptodora kindtii	0	8.30261	9.12402	0.69897
10	Leptodora kindtii	2.26007	8.32838	8.9184	0.69897
