# Supplementary material for: Unraveling Zooplankton Diversity in a Pre-Alpine Lake: A Comparative Analysis of ZooScan and DNA Metabarcoding Methods
Source: MDPI journal article supplement (doi:10.3390/w16030411), 2024-01-26
Supplement: s1 [file s1 › water-2789378-supplementary.pdf]

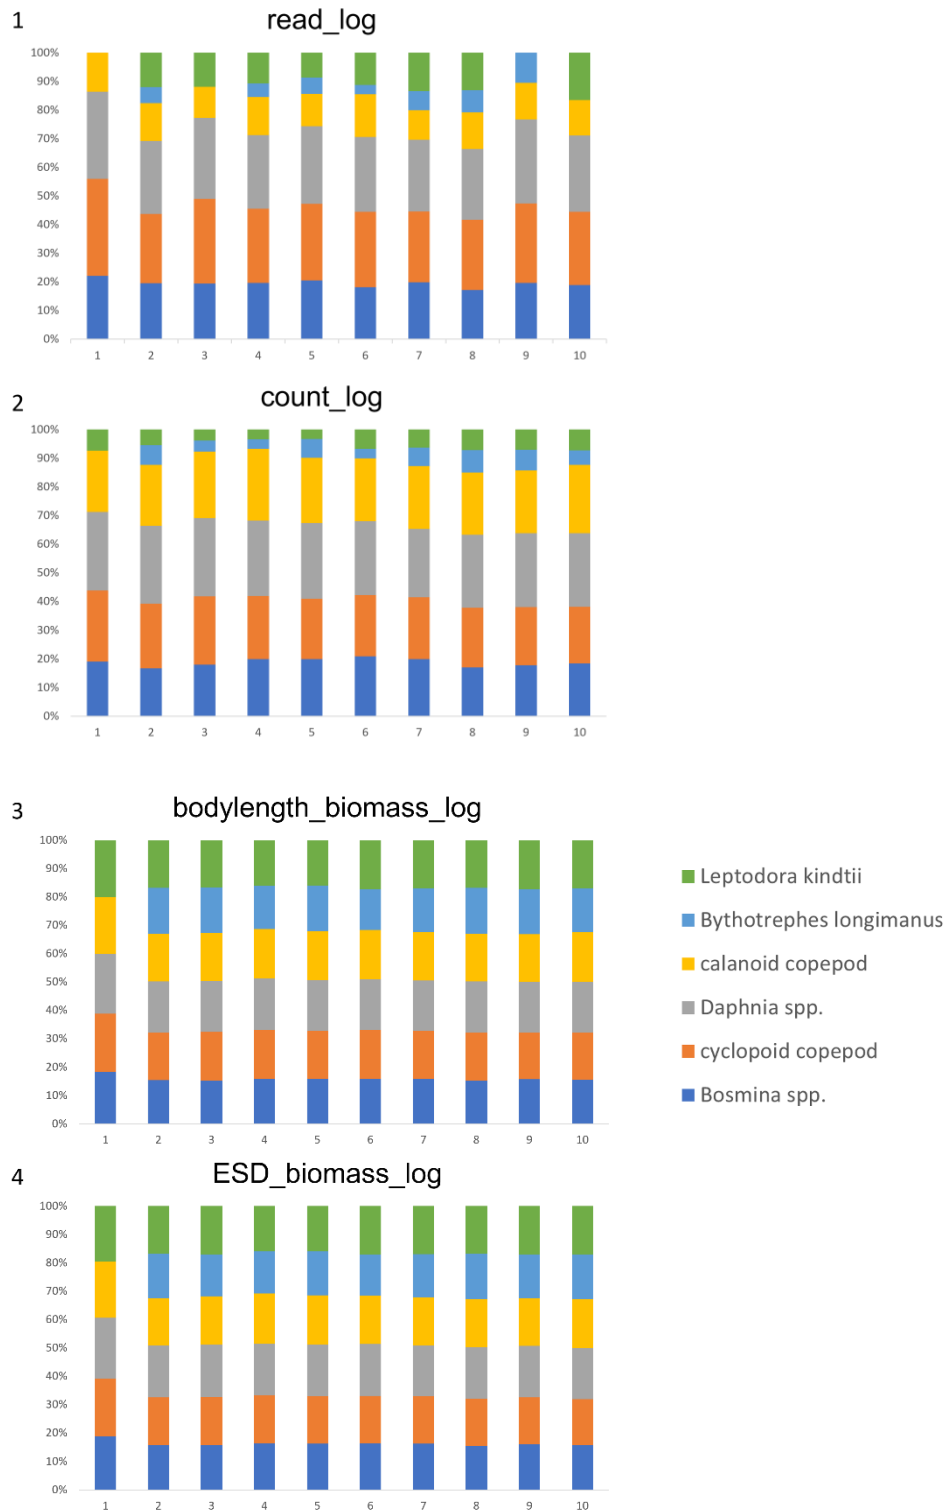

**Figure S1.** Zooplankton distribution based on 10 samples (each collected in September 2021) along a north-south sampling transect in Lake Starnberg. The transformed zooplankton abundances from metabarcoding (read\_log) and ZooScan (count\_log) are presented, along with the calculated biomass estimations (maj\_biomass\_log, ESD\_biomass\_log).
